# Supplementary material for: One step route to the fabrication of arrays of TiO2nanobowls via a complementary block copolymer templating and sol–gel process
Source: Royal Society of Chemistry journal article supplement (doi:10.1039/b712125c), 2008-01-01
Supplement: b712125c.pdf [file b712125c.pdf]

## Supporting Information

### One Step Route to the Fabrication of Arrays of TiO<sub>2</sub> Nanobowls via Complementary Block Copolymer Templating and Sol-Gel Process

Xue Li,<sup>1</sup> Juan Peng,<sup>2</sup> Joo-Hee Kang,<sup>4</sup> Jin-Ho Choy,<sup>4</sup> Martin Steinhart,<sup>3</sup> Wolfgang Knoll<sup>2</sup> and Dong Ha Kim<sup>4\*</sup>

<sup>1</sup>*School of Chemistry and Chemical Engineering, University of Jinan, 106 Jiwei Road, Jinan 250022, People's Republic of China*

<sup>2</sup>*Max Planck Institute for Polymer Research, Ackermannweg 10, 55128 Mainz, Germany*

<sup>3</sup>*Max Planck Institute for Microstructure Physics, Weinberg 2, D-06120 Halle, Germany*

<sup>4</sup>*Division of Nano Sciences and Department of Chemistry, 11-1 Daehyun-Dong, Seodaemun-Gu, Seoul 120-750, Korea*

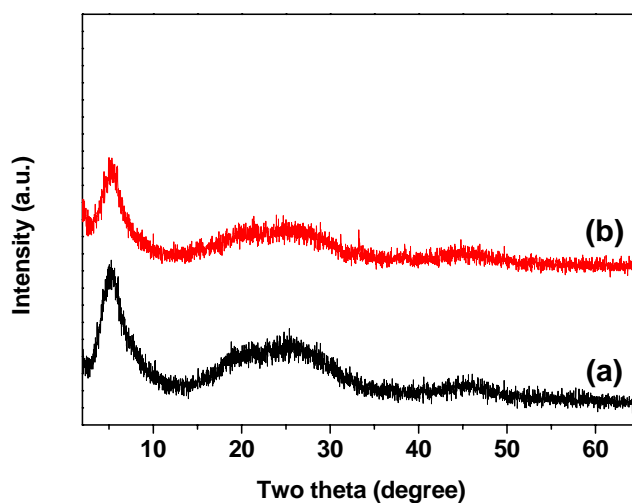

Figure S1. XRD patterns for the initial hybrid SEO/TiO<sub>2</sub> (a) and SEO/HAuCl<sub>4</sub>(0.1)/TiO<sub>2</sub> (b) films.

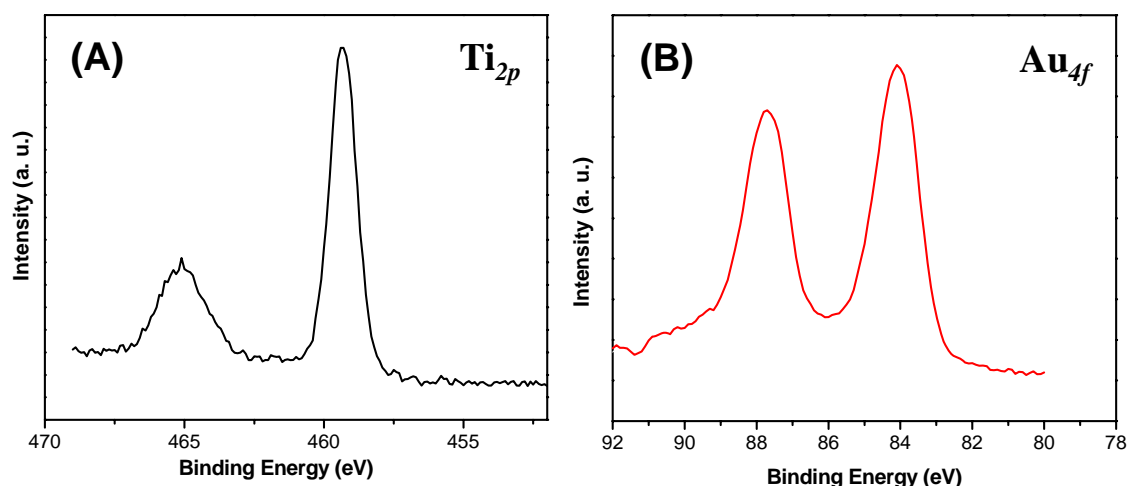

Figure S2. (a) High-resolution XPS  $Ti_{2p}$  spectrum of the surface of a porous hybrid PS-*b*-PEO/SG film. (b) High-resolution XPS  $Au_{4f}$  spectrum of the surface of Au/TiO<sub>2</sub> nanobowls obtained from porous hybrid PS-*b*-PEO/HAuCl<sub>4</sub>/SG films after removal of the block copolymers.

The high resolution  $Ti_{2p}$  spectrum (Figure S2(A)) exhibits characteristic peaks of  $Ti_{2p3/2}$  and  $Ti_{2p1/2}$  in TiO<sub>2</sub> at 459.4 eV and 465.2, respectively.<sup>33,34</sup> From the composite Au/titania nanobowls by introducing HAuCl<sub>4</sub> precursor to the PS-*b*-PEO/SG system followed by the removal the block copolymer with deep UV irradiation, characteristic peaks of Au<sup>0</sup> at 87.6 eV (Au4f<sub>5/2</sub>) and 84.1 eV (Au4f<sub>7/2</sub>) on the surfaces of the nanobowls are observed (Figure B).<sup>34</sup> Such hybrid nanostructures can help prevent the coalesce of Au nanoparticles on TiO<sub>2</sub> surface.<sup>35</sup>

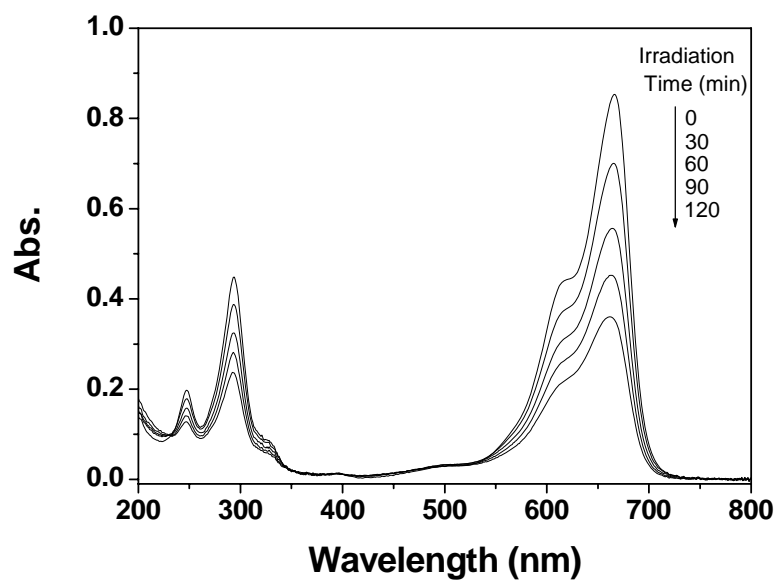

Figure S3. Photocatalytic activity of an PS-*b*-PEO/Au/TiO<sub>2</sub> film in terms of the decomposition of methylene blue as a function of UV irradiation time.
